# Supplementary material
Source: MDPI journal article supplement (https://www.mdpi.com/2311-7524/9/10/1097)
Supplement: s1 [file s1 › Supplementary Table S1.xlsx]

## Sheet: Sheet1
Cultivar	GRIN Accession Number	Origin	References	Fruit rot resistance based on this study	Fruit Color
Afganski	DPUN 0071	Former Soviet Union	GRIN-Global (Version 2.3.5).		Pink/Red
Al-Sirin-Nar	DPUN 0060	Azerbaijan or Turkmenistan	Chater et al (2021)		Red
Ambrosia	DPUN 0048	California, USA	GRIN-Global (Version 2.3.5).		Red
Angel Red		Georgia, USA	Castle (2022)		Pink
Apseronski Krasnyj	DPUN 0072	Former Soviet Union	GRIN-Global (Version 2.3.5).		Red
Arakta		India	Castle (2022)	Resistant	Red
Azadi	DPUN 0135	Balkan, Turkmenistan	GRIN-Global (Version 2.3.5).	Highly resistant	Yellow/Pink
Bala Miursal	DPUN 0070	Former Soviet Union	GRIN-Global (Version 2.3.5).		Red
Christina		Florida, USA	Castle (2022)	Resistant	Yellow/Pink
Cranberry	DPUN 0086	California, USA	GRIN-Global (Version 2.3.5).		Red
Desertnyi	DPUN 0108	Turkmenistan	Chater et al (2021); GRIN-Global (Version 2.3.5).		Red
Don Somner South		Georgia, USA	Castle (2022)		Pink/Red
Eve	DPUN 0089	California, USA	GRIN-Global (Version 2.3.5).		Red
Eversweet	DPUN 0050	California, USA	GRIN-Global (Version 2.3.5).	Resistant	Pink
Fleischman	DPUN 0028	California, USA	GRIN-Global (Version 2.3.5).	Resistant	Yellow/Pink
Gainey Sweet		Florida, USA	Castle (2022)		Pink/Red
Girkanets	DPUN 0126	Balkan, Turkmenistan	GRIN-Global (Version 2.3.5).		Red
Gissarskii Rozovyi	DPUN 0107	Turkmenistan	GRIN-Global (Version 2.3.5).		Pink/Red
Grenada		Georgia, USA	Castle (2022)		Red
Jimmy Roppe		Florida, USA	Castle (2022)	Resistant	Pink
Kaim-anor	DPUN 0061	Former Soviet Union	GRIN-Global (Version 2.3.5).		Pink
Kazake	DPUN 0073	Former Soviet Union	GRIN-Global (Version 2.3.5).		Red
Larkin		Florida, USA	Castle (2022)		Yellow/Pink
Medovyi Vahsha	DPUN 0109	Turkmenistan	GRIN-Global (Version 2.3.5).		Red
Molla-Nepes	DPUN 0014	Turkmenistan	GRIN-Global (Version 2.3.5).		Red
Nikitski-ranni	DPUN 0067	Former Soviet Union	GRIN-Global (Version 2.3.5).		Red
Parfianka	DPUN 0015	Turkmenistan	Chater et al (2021); GRIN-Global (Version 2.3.5).		Red
Rose		Georgia, USA	Castle (2022)		Red
Sakerdze	DPUN 0059	Former Soviet Union	GRIN-Global (Version 2.3.5).		Red
Salavatski	DPUN 0062	Former Soviet Union	GRIN-Global (Version 2.3.5).		Pink/Red
Shirin Zigar	DPUN 0103	Turkmenistan	GRIN-Global (Version 2.3.5).		Pink/Red
Sin Pepe		California, USA	Castle (2022)		Pink/Red
Sirenevyi	DPUN 0151	Balkan, Turkmenistan	GRIN-Global (Version 2.3.5).		Red
Surh-Anor	DPUN 0075	Former Soviet Union	GRIN-Global (Version 2.3.5).		Red
Sweet		Georgia, USA	Castle (2022)		Red
Vkusnyi	DPUN 0117	Balkan, Turkmenistan	GRIN-Global (Version 2.3.5).		Red
Castle, W. 2022. Pomegranates for Now - Accessions. https://crec.ifas.ufl.edu/extension/pomegranates/accessions/
Chater, J.M.; Yavari, A.; Sarkhosh, A.; Jia, Z.; Merhaut, D.J.; Preece, J.E.; Cossio, F.; Qin, G.; Liu, C.; Li, J.; Shipa, P.; Babu, K.D.; Sharma, J.; Ylmaz, C.; Bartual, J.; Mustafayeva, Z.; Saeedi, M.A.; Awd, N.A.; Moersfelder, J.; and Hou, L. World pomegranate cultivars. In The Pomegranate: Botany, Production and Uses; Sarkhosh, A., Alimohammad, M.Y., Zamani, E., Eds. CABI, 2021; pp 157-199.
GRIN-Global (U.S. National Plant Germplasm System), Version 2.3.5 (https://npgsweb.ars-grin.gov/gringlobal/search?q=pomegranate).
